# Supplementary material for: The Aspergillus fumigatus Phosphoproteome Reveals Roles of High-Osmolarity Glycerol Mitogen-Activated Protein Kinases in Promoting Cell Wall Damage and Caspofungin Tolerance
Source: PubMed Central journal article supplement (PMC7002344; doi:10.1128/mbio.02962-19), 2020-02-04
Supplement: mBio.02962-19-sf001.pdf [file mBio.02962-19-sf001.pdf]

**A.**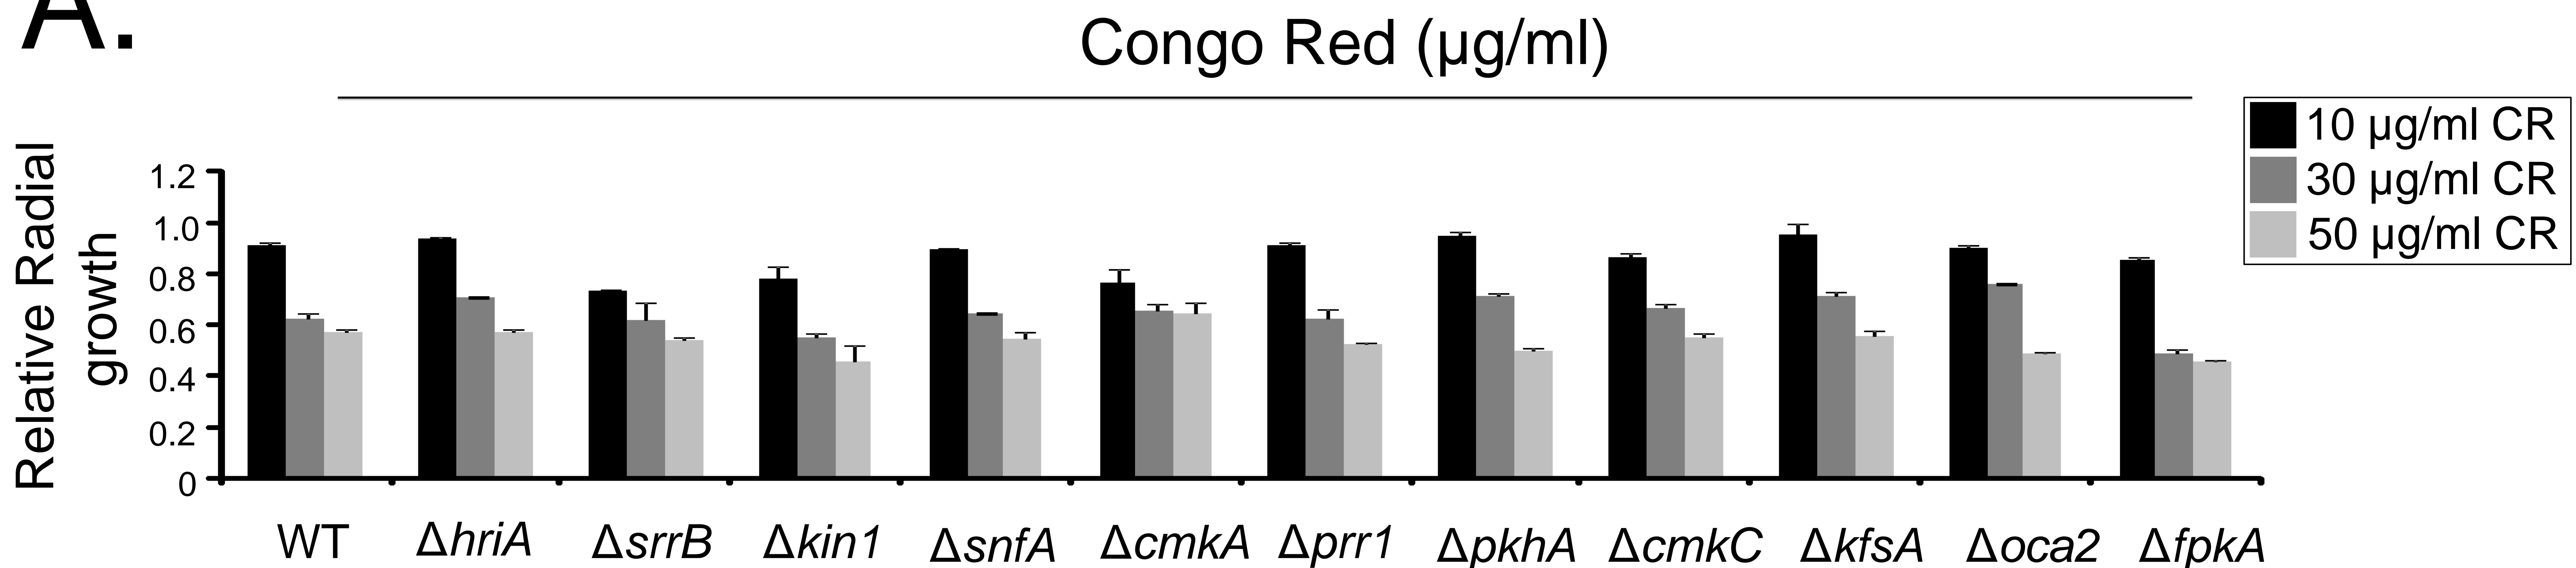**B.**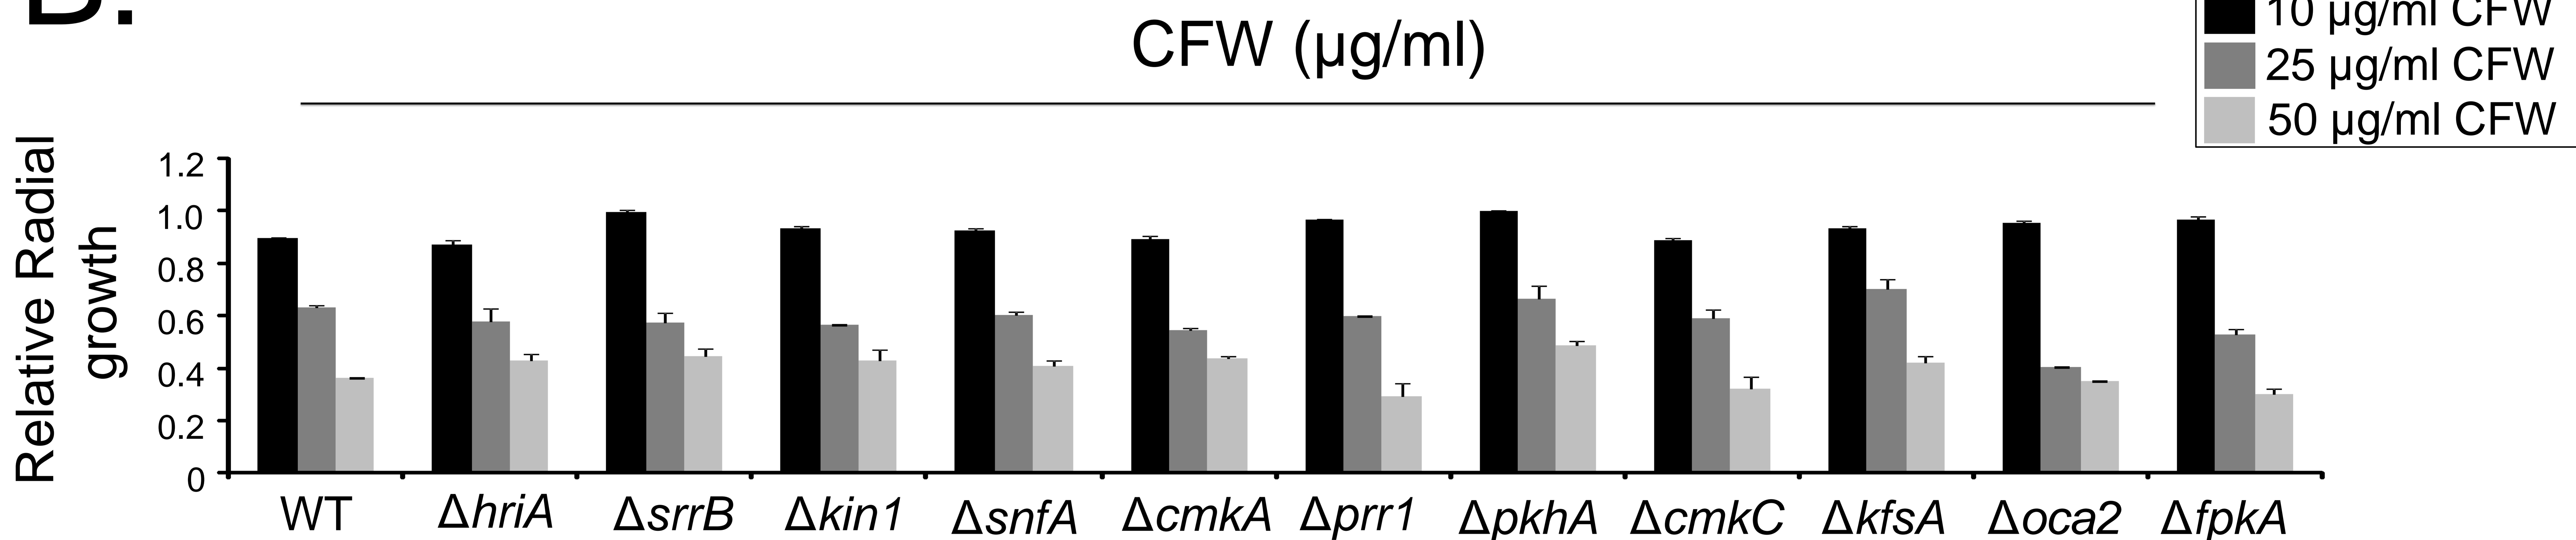**C.**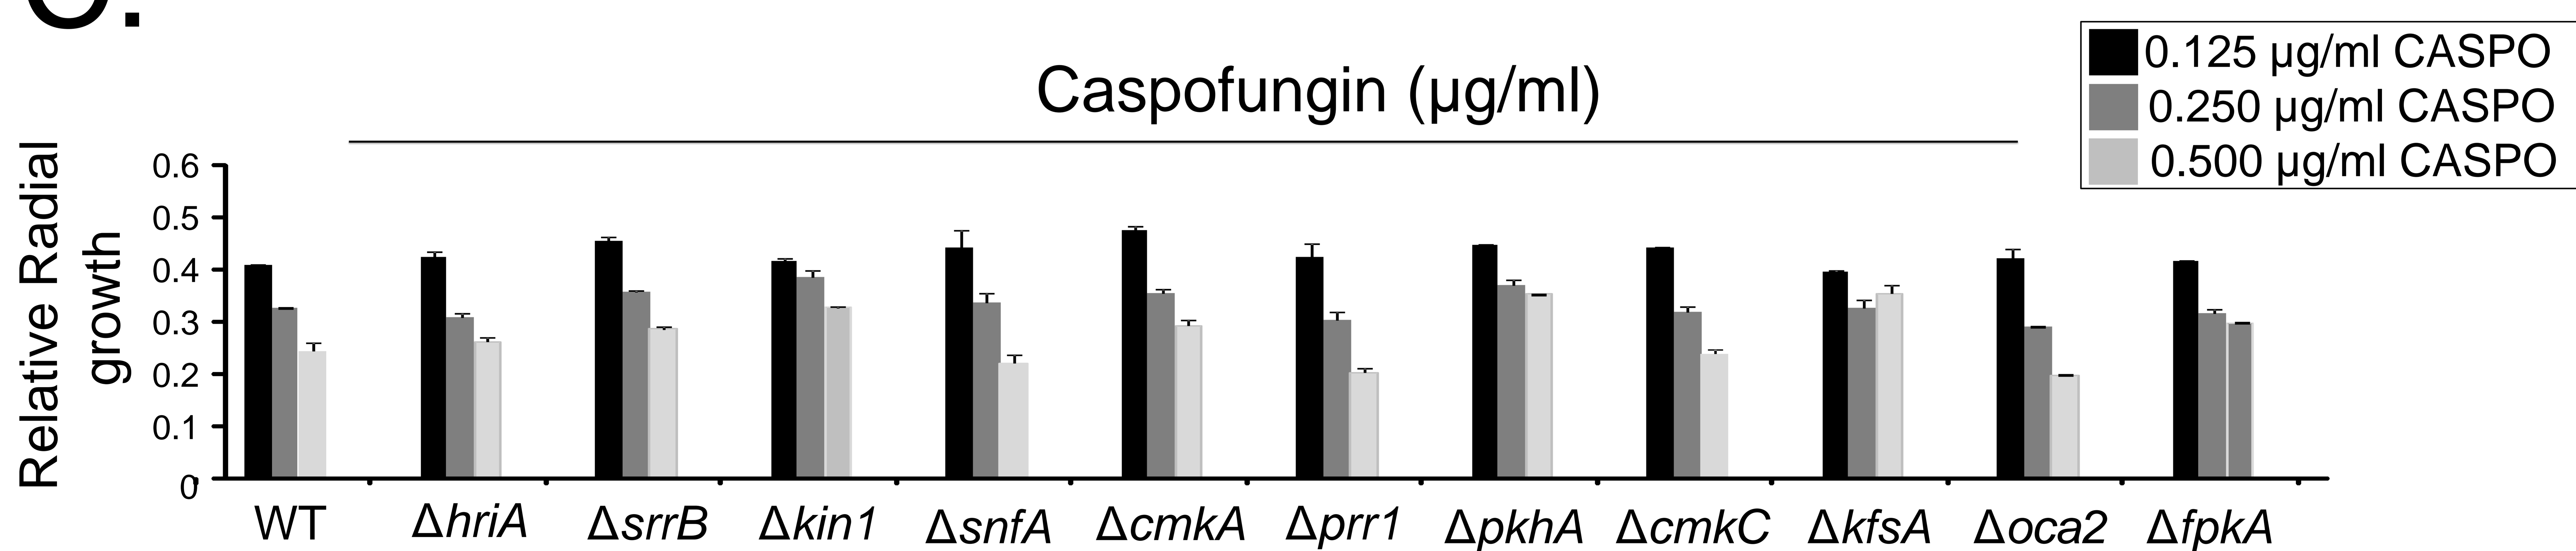**D.**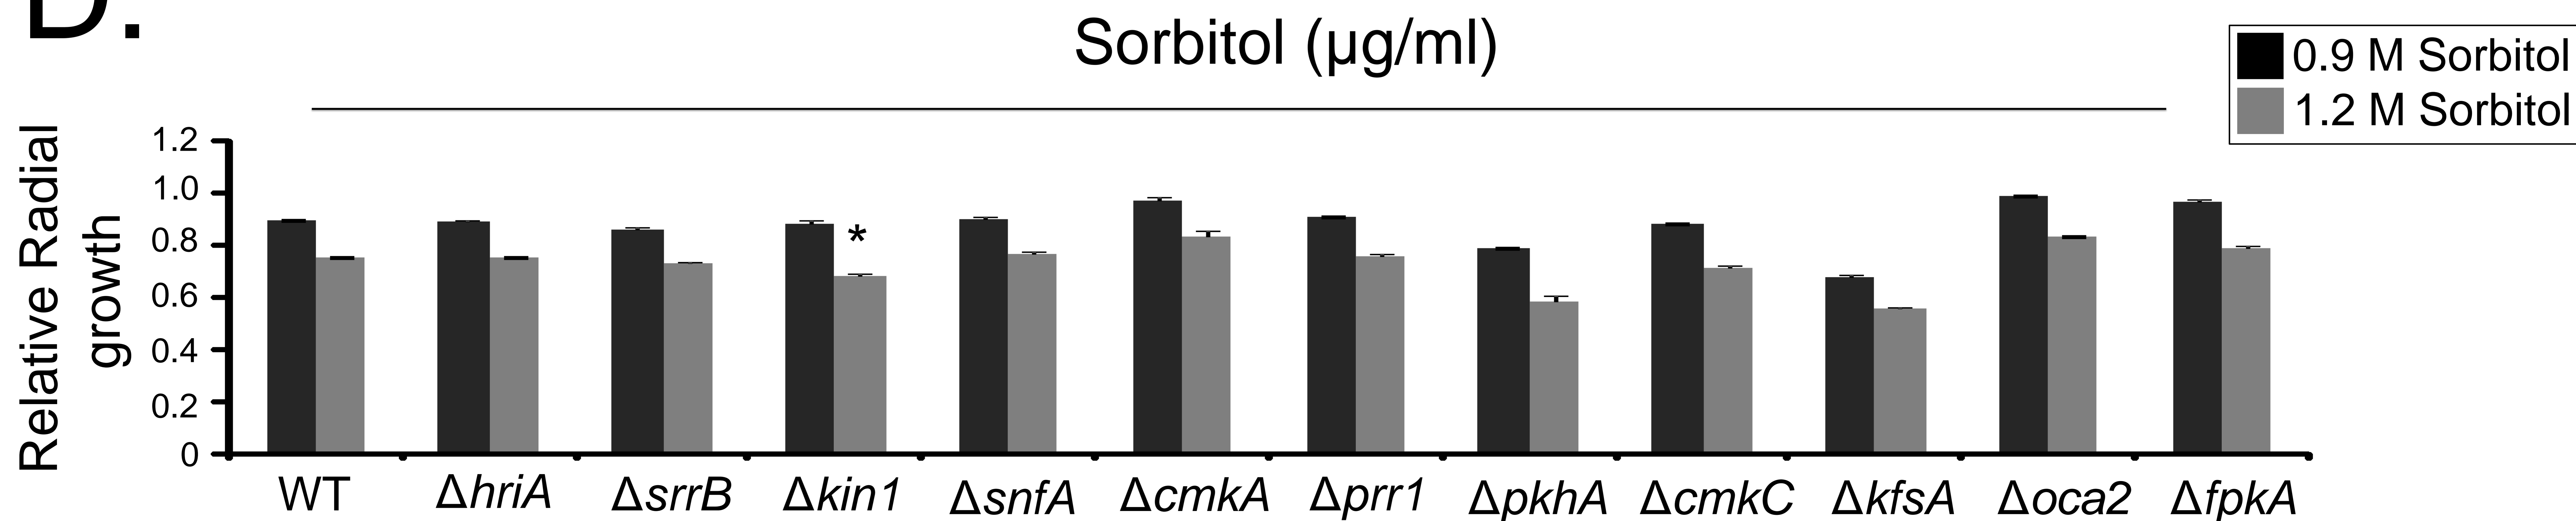

**Supplementary Figure S1. Null kinase mutants grown on different stress conditions.** *A. fumigatus* Conidia ( $10^5$ ) were inoculated on solid minimal medium (MM) with different concentrations of Congo Red, Calcofluor white (CFW), Sorbitol and caspofungin and grown for 5 day at 37°C.
